# Supplementary material
Source: publisher figshare collection journal article supplement (https://acs.figshare.com/ndownloader/files/4024165)
Supplement: Supplementary file 1 [file 4024165]

# Surface Treatments for Inkjet Printing onto a PTFE-based Substrate for High Frequency Applications

*Ying Ying Lim\*, Yee Mey Goh, Changqing Liu*

Wolfson School of Mechanical & Manufacturing Engineering, Loughborough University, Epinal Way, Loughborough, Leicestershire, LE11 3TU, United Kingdom

\* Corresponding author. Email: [y.y.lim@lboro.ac.uk](mailto:y.y.lim@lboro.ac.uk), Phone: +44 (0) 1509 227684

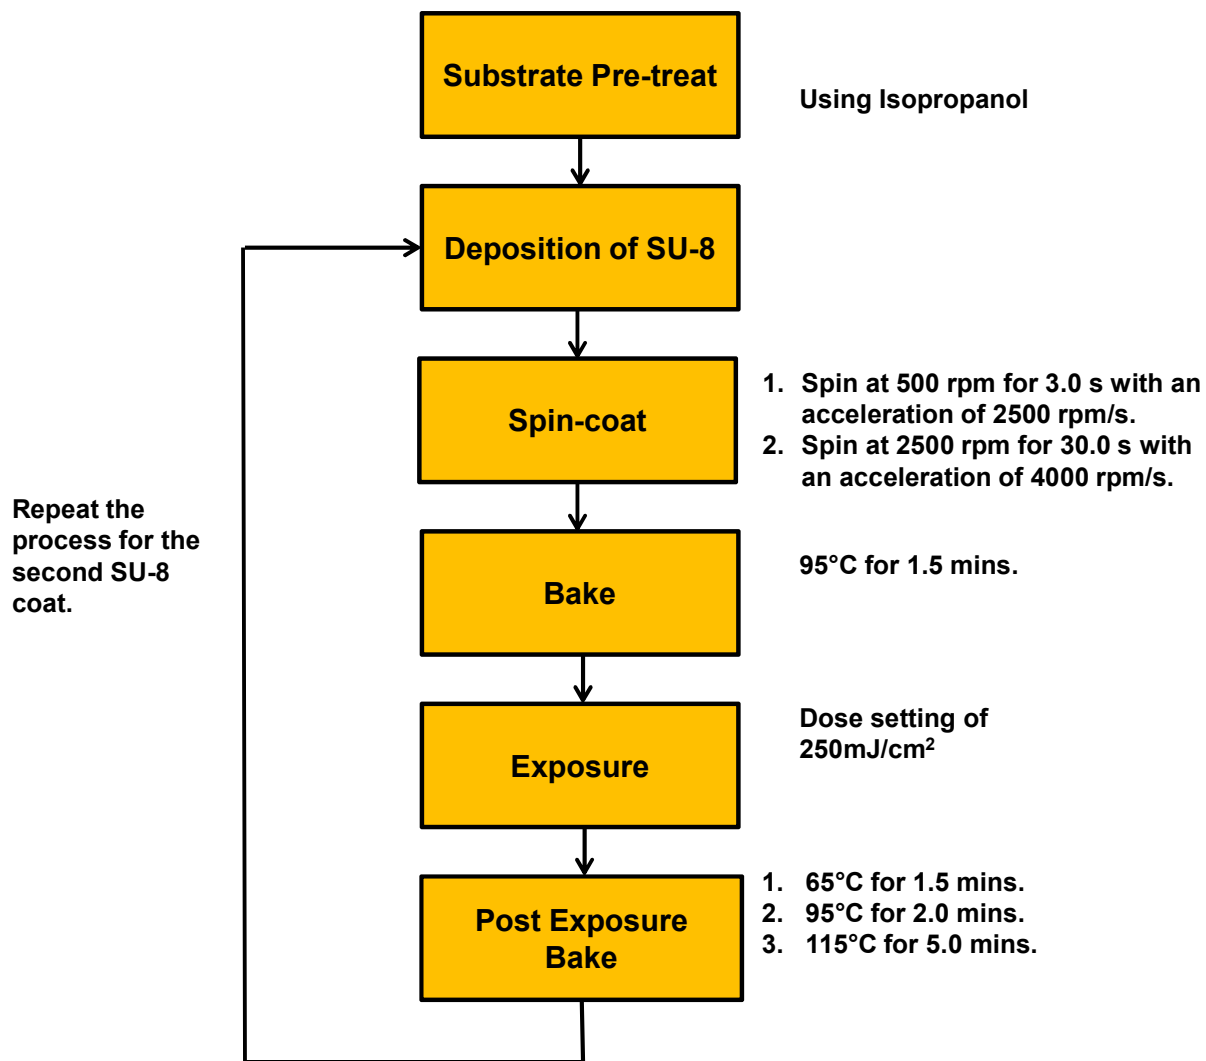

**Figure S1.** Process flow for application of SU-8 onto RO3006 substrate.

**Table S1.** Measured mean and error limits from the surface morphology characterization.

| <b>R<sub>a</sub> (μm)</b> | <b>Mean</b> | <b>Error (upper)</b> | <b>Error (Lower)</b> |
|---------------------------|-------------|----------------------|----------------------|
| Untreated RO3006          | 0.76        | 0.22                 | 0.11                 |
| Hydrophobic coating       | 0.93        | 0.08                 | 0.15                 |
| SU-8 coating              | 0.22        | 0.07                 | 0.03                 |
| EMD 6200 coating          | 0.44        | 0.16                 | 0.11                 |
